# Supplementary material for: Mapping of transgenic alleles in soybean using a nanopore-based sequencing strategy
Source: PubMed Central journal article supplement — J Exp Bot. 2019 Apr 30;70(15):3825–33. doi: 10.1093/jxb/erz202 (PMC6685662; doi:10.1093/jxb/erz202), 2019-04-30
Supplement: erz202_suppl_supplementary_figures_s1-s4_tables_s1-s4.pdf [file erz202_suppl_supplementary_figures_s1-s4_tables_s1-s4.pdf]

**Fig. S1**

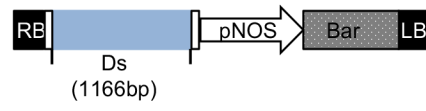

**Fig. S1.** The diagram of the *Ds* system.

**Fig. S2**

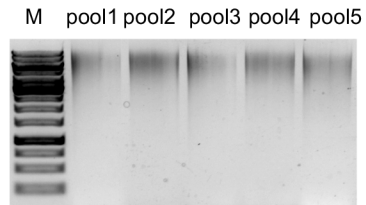

**Fig. S2.** Agarose gel electrophoresis of sheared DNA. 8  $\mu\text{g}$  genomic DNA samples in 150  $\mu\text{l}$  ddH<sub>2</sub>O were fragmented to 8 kb

**Fig. S3**

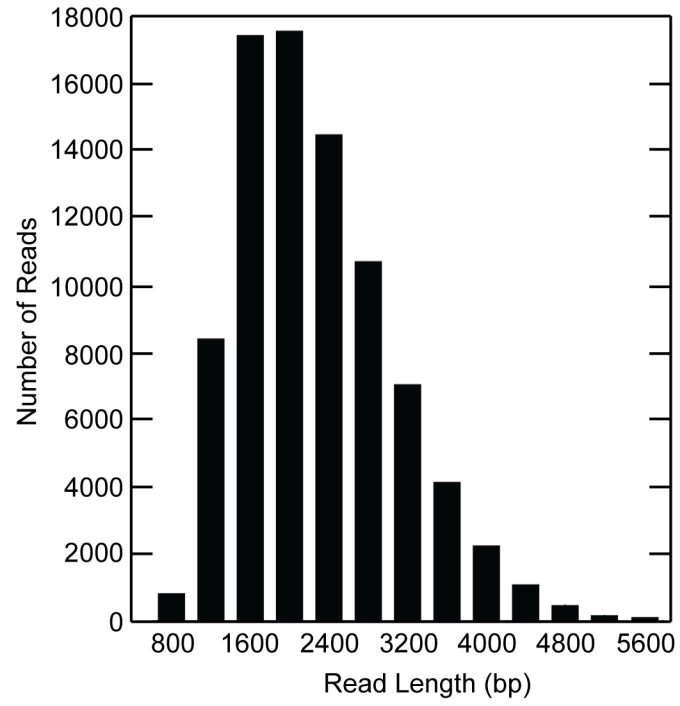

**Fig. S3.** Size distribution of readings containing the *Ds* elements.

**Fig. S4**

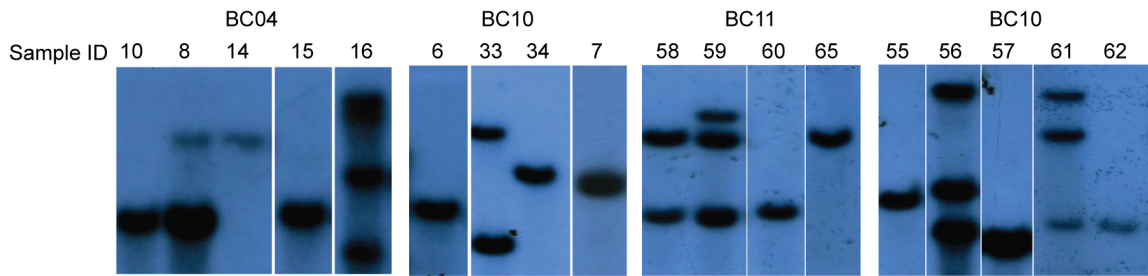

**Fig. S4.** Copy numbers of the transgenes in various soybean transgenic lines determined by Southern Blot. DNAs from various plants were digested with the EcoRI restriction enzyme and the T-DNA insertions were detected using probes recognizing the Cauliflower mosaic virus 35S promoter.

**Table S1: DNA oligos used in this study.**

| <b>Name</b>                   | <b>Sequence</b>                                                                                                      | <b>Application</b> |
|-------------------------------|----------------------------------------------------------------------------------------------------------------------|--------------------|
| <b>Primers for constructs</b> |                                                                                                                      |                    |
| BC01                          | AAGAAAGTTGTCGGTGTCTTTGTG                                                                                             | barcoding          |
| BC02                          | TCGATTCCGTTTGTAGTCGTCTGT                                                                                             | barcoding          |
| BC03                          | GAGTCTTGTGTCCCAGTTACCAGG                                                                                             | barcoding          |
| BC04                          | TTCGGATTCTATCGTGTTCCTA                                                                                               | barcoding          |
| BC05                          | CTTGTCCAGGGTTTGTGTAACCTT                                                                                             | barcoding          |
| BC06                          | TTCTCGCAAAGGCAGAAAGTAGTC                                                                                             | barcoding          |
| BC07                          | GTGTTACCGTGGGAATGAATCCTT                                                                                             | barcoding          |
| <b>Primers for qRT-PCR</b>    |                                                                                                                      |                    |
| DSF3                          | TGTGTGATTTTACCGAACAAAATAC                                                                                            | target region      |
| DSR                           | ATAGGGATGAAAACGGTCGGTAACG                                                                                            |                    |
| Gm07F-HN                      | TAAGAGGGTCATGTACATTGTGAGAA                                                                                           | internal control   |
| Gm07R-HN                      | AACACAGGGAATAAGACACAATCTAG                                                                                           |                    |
| <b>Primers for validation</b> |                                                                                                                      |                    |
| Gm15G128500.1F2               | CACAACATGTAGTAAGCCTAATTTCAA                                                                                          | Line 1 validation  |
| Gm15G128500.1R2               | AGTATTCTGGTTACTGATGAAGCTGTT                                                                                          |                    |
| Gm19G105100F                  | TTAGTCAAACTCAAAGTCTTCTCGT                                                                                            | Line 2 validation  |
| Gm19G105100R                  | TTGAGTCTATGGAGTAAGGTGGTTAGT                                                                                          |                    |
| Gm11G247400F                  | GCAATTTGGTTTATTTATCTGACTCAC                                                                                          | Line 3 validation  |
| Gm11G247400R                  | ATCTATGGTAAACAACAATGCCTCTAT                                                                                          |                    |
| Gm15G128600F                  | AGTATTCTGGTTACTGATGAAGCTGTT                                                                                          | Line 13 validation |
| Gm15G128600R                  | ATAAACTAATTTAAGGTGCATCAATGG                                                                                          |                    |
| Gm05G163800F                  | GATCACACTTTTAAGAGGAATTTGATT                                                                                          | Line 14 validation |
| Gm05G163800R                  | TCATCATAATCATCATCATAGAAATCG                                                                                          |                    |
| Gm11G181700F                  | CTTTTACAGGTTCTGAGGATGTAAGTC                                                                                          | Line 15 validation |
| Gm11G181700R                  | GGTTACATGCATACCATCTATATTTCC                                                                                          |                    |
| <b>Probe sequence</b>         |                                                                                                                      |                    |
| Ds-probe                      | Bio/ACCAGGCGAAGAAAAGAATCTTGAAGACGT<br>AAGCACTGACGACAACAATGAAAAGAAGAAGAT<br>AAGGTCGGTGATTGTGAAAGAGACATAGAGGAC<br>ACAT | target enrichment  |

**Table S2. Positions of *Ds* insertions identified in the 15-sample sequencing**

|            | Line number | Genomic position | Read count | P-value                 |
|------------|-------------|------------------|------------|-------------------------|
| DNA pool 1 | Line 4      | Glyma01G42560    | 678        | 0                       |
|            | Line 5      | Glyma17G16741    | 214        | $4.03 \times 10^{-209}$ |
|            | Line 6      | Glyma02G21350    | 127        | $4.78 \times 10^{-98}$  |
| DNA pool 2 | Line 7      | Glyma09G31520    | 5910       | 0                       |
|            | Line 8      | Glyma01G42560    | 8125       | 0                       |
|            | Line 9      | Glyma06G08505    | 11051      | 0                       |
| DNA pool 3 | Line 10     | Glyma17G09910    | 1110       | 0                       |
|            | Line 11     | Glyma06G08505    | 2965       | 0                       |
|            | Line 12     | Glyma03G31420    | 1285       | 0                       |
| DNA pool 4 | Line 13     | Glyma15G13491    | 14318      | 0                       |
|            | Line 14     | Glyma05G29675    | 2933       | 0                       |
|            | Line 15     | Glyma11G18750    | 2216       | 0                       |
| DNA pool 5 | Line 16     | Glyma01G42560    | 2596       | 0                       |
|            | Line 17     | Glyma19G27930    | 1542       | 0                       |
|            | Line 18     | Glyma03G31420    | 2127       | 0                       |

**Table S3. Positions of *Ds* insertions identified in the 51-sample sequencing**

|            | Line number         | Genomic position                      | Read count             | P-value                 |
|------------|---------------------|---------------------------------------|------------------------|-------------------------|
| DNA pool 1 | Line 19             | Glyma14G08990                         | 367                    | 0                       |
|            | Line 20             | Glyma01G00430                         | 214                    | $8.74 \times 10^{-164}$ |
|            | Line 21             | Glyma04G41125                         | 144                    | $2.04 \times 10^{-88}$  |
|            | Line 22             | Glyma20G24766                         | 105                    | $1.83 \times 10^{-52}$  |
|            | Line 23             | Glyma16G029400                        | 54                     | $1.77 \times 10^{-15}$  |
|            | Line 24             | Glyma11G36210                         | 38                     | $1.87 \times 10^{-7}$   |
|            | Line 25             | Glyma16G02846                         | 18                     | $1.83 \times 10^{-1}$   |
|            | Line 26             | Glyma15G (46980528-                   | 18                     | $1.83 \times 10^{-1}$   |
| DNA pool 2 | Line 27             | Glyma03G (5158136-                    | 23                     | $3.56 \times 10^{-22}$  |
|            | Line 28             | Glyma11G34210                         | 7                      | $7.14 \times 10^{-5}$   |
|            | Line 29             | Glyma02G412470                        | 7                      | $7.14 \times 10^{-5}$   |
|            | Line 30             | Glyma15G43170                         | 5                      | $2.40 \times 10^{-3}$   |
|            | Line 31             | Glyma09G41490                         | 4                      | $1.13 \times 10^{-2}$   |
|            | Line 32             | Glyma11G36210                         | 4                      | $1.13 \times 10^{-2}$   |
|            | Line 33             | Glyma07G16300                         | 4                      | $1.13 \times 10^{-2}$   |
|            | Line 34             | Glyma07G17370                         | 3                      | $4.51 \times 10^{-2}$   |
| DNA pool 3 | Line 35             | Glyma01G03260                         | 314                    | 0                       |
|            | Line 36             | Glyma03G (5158131-                    | 115                    | $1.96 \times 10^{-91}$  |
|            | Line 37             | Glyma05G36050                         | 37                     | $6.38 \times 10^{-15}$  |
|            | Line 38             | Glyma16G (769719-769733) <sup>a</sup> | 28                     | $4.03 \times 10^{-9}$   |
|            | Line 39             | Glyma07G17370                         | 15                     | $6.21 \times 10^{-3}$   |
|            | Line 40             | Glyma04G40780                         | 14                     | $1.34 \times 10^{-2}$   |
|            | Line 41             | Glyma19G02591                         | 9                      | $2.53 \times 10^{-1}$   |
|            | Line 42             | Glyma13G (1615654-                    | 9                      | $2.53 \times 10^{-1}$   |
| DNA pool 4 | Line 43             | Glyma09G32070                         | 1374                   | 0                       |
|            | Line 44             | Glyma16G (32671274-                   | 852                    | 0                       |
|            | Line 45             | Glyma15G18571                         | 403                    | 0                       |
|            | Line 46             | Glyma15G10791                         | 154                    | $6.92 \times 10^{-74}$  |
|            | Line 47             | Glyma07G17350                         | 107                    | $4.50 \times 10^{-38}$  |
|            | Line 48             | Glyma13G01110                         | 89                     | $1.59 \times 10^{-26}$  |
|            | Line 49             | Glyma13G01110                         | 70                     | $5.01 \times 10^{-16}$  |
|            | Line 50             | Glyma02G41957                         | 65                     | $1.33 \times 10^{-13}$  |
| DNA pool 5 | Line 51             | Glyma15G18571                         | 341                    | 0                       |
|            | Line 52             | Glyma11G37670                         | 265                    | $2.06 \times 10^{-233}$ |
|            | Line 53             | Glyma02G (7668714-                    | 181                    | $2.94 \times 10^{-132}$ |
|            | Line 54             | Glyma17G34380                         | 143                    | $1.15 \times 10^{-91}$  |
|            | Line 55             | Glyma08G44010                         | 114                    | $1.44 \times 10^{-63}$  |
|            | Line 56             | Glyma03G41100                         | 108                    | $3.98 \times 10^{-58}$  |
|            | Line 57             | Glyma16G (7668714-                    | 91                     | $1.65 \times 10^{-43}$  |
|            | Line 58             | Glyma05G37440                         | 73                     | $1.62 \times 10^{-29}$  |
| Line 59    | Glyma18G (32671286- | 67                                    | $2.99 \times 10^{-25}$ |                         |
| DNA pool 6 | Line 60             | Glyma04G41100                         | 3555                   | 0                       |
|            | Line 61             | Glyma11G36210                         | 1622                   | 0                       |
|            | Line 62             | Glyma20G03910                         | 156                    | $6.09 \times 10^{-35}$  |
|            | Line 63             | Glyma11G (6956901-                    | 152                    | $6.46 \times 10^{-33}$  |
|            | Line 64             | Glyma11G09070                         | 139                    | $1.91 \times 10^{-26}$  |
|            | Line 65             | Glyma11G07661                         | 92                     | $9.96 \times 10^{-9}$   |
|            | Line 66             | Glyma11G03370                         | 79                     | $2.27 \times 10^{-5}$   |
|            | Line 67             | Glyma11G (39121891-                   | 73                     | $4.19 \times 10^{-4}$   |
|            | Line 68             | Glyma08G13510                         | 71                     | $1.00 \times 10^{-3}$   |
|            | Line 69             | Glyma15G01120                         | 62                     | $2.67 \times 10^{-2}$   |

<sup>a</sup> means that the *Ds* insertion site localizes in the intergenic region.

**Table S4. Sequencing result of T-DNA insertion lines**

| Pools                  | Samples | Southern insertion #    | Identified locations    | Number of reads |
|------------------------|---------|-------------------------|-------------------------|-----------------|
| BC012                  | 55      | 1                       | Chr17:6720565-6720741   | 189             |
|                        | 56      | 3                       | Chr8:1883683_1883811    | 113             |
|                        |         |                         | Chr16:26916636-26916774 | 102             |
|                        | 57      | 1                       | Chr14:6470983-6471174   | 94              |
|                        | 61      | 3                       | Chr15:9255527-9255654   | 38              |
| Chr1:1656868-1657006   |         |                         | 27                      |                 |
| 62                     | 1       | Chr17:6746122-6746317   | 13                      |                 |
| BC011                  | 58      | 2                       | Chr11:36293284-36293325 | 11              |
|                        |         |                         | Chr17:10072860-10072999 | 10              |
|                        | 59      | 3                       | Chr7:39843827-39844019  | 153             |
|                        |         |                         | Chr19:1778510-1778664   | 145             |
|                        | 60      | 1                       | Chr16:26916638-26916723 | 94              |
| Chr4:47915113-47915165 |         |                         | 12                      |                 |
| 65                     | 1       | Chr7:39844036-39844222  | 8                       |                 |
| BC010                  | 6       | 1                       | Chr11:36292812-36292827 | 7               |
|                        |         |                         | Chr9:38515015-38515215  | 467             |
|                        | 34      | 1                       | Chr14:45970969-45970988 | 82              |
|                        |         |                         | Chr9:38515223-38515420  | 19              |
|                        | 7       | 1                       | Chr14:45970754-45970951 | 9               |
| 33                     | 2       | Chr2:35224556-35224587  | 8                       |                 |
|                        |         | Chr9:38515439-38515621  | 8                       |                 |
| BC04                   | 10      | 1                       | Chr19:48852620-48852751 | 90              |
|                        | 8       | 2                       | Chr3:37108399-37108520  | 71              |
|                        |         |                         | Chr2:588378-588482      | 38              |
|                        | 14      | 1                       | Chr19:48851289-48851375 | 29              |
|                        |         |                         | Chr3:37108764-37108917  | 5               |
| 15                     | 1       | Chr8:45198635-45198660  | 4                       |                 |
| 16                     | 3       | Chr17:3073403-3073433   | 3                       |                 |
|                        |         | Chr19:48851082-48851170 | 3                       |                 |
